# Supplementary material
Source: PubMed Central journal article supplement (PMC2782269)
Supplement: tpc.109.067017_1.pdf [file tpc.109.067017_1.pdf]

Supplemental Data, Sterken et al., (2009) A population genomics study of the Arabidopsis core cell cycle genes shows the signature of natural selection.

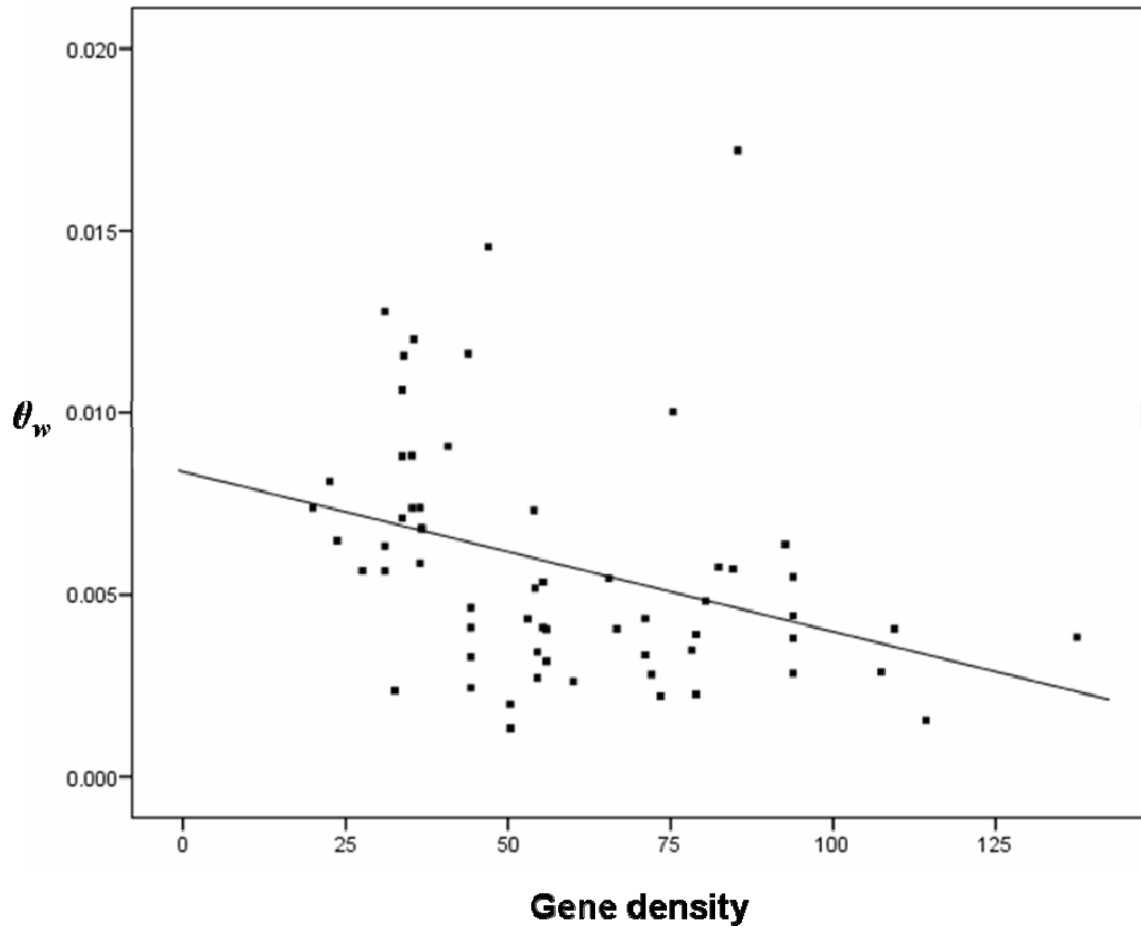

**Supplemental Figure 1.** Scatter between SNP diversity  $\theta_w$  per CCC gene region and local gene density (measured in ORF per centiMorgan).  $R^2 = 0.118$ , Pearson correlation.

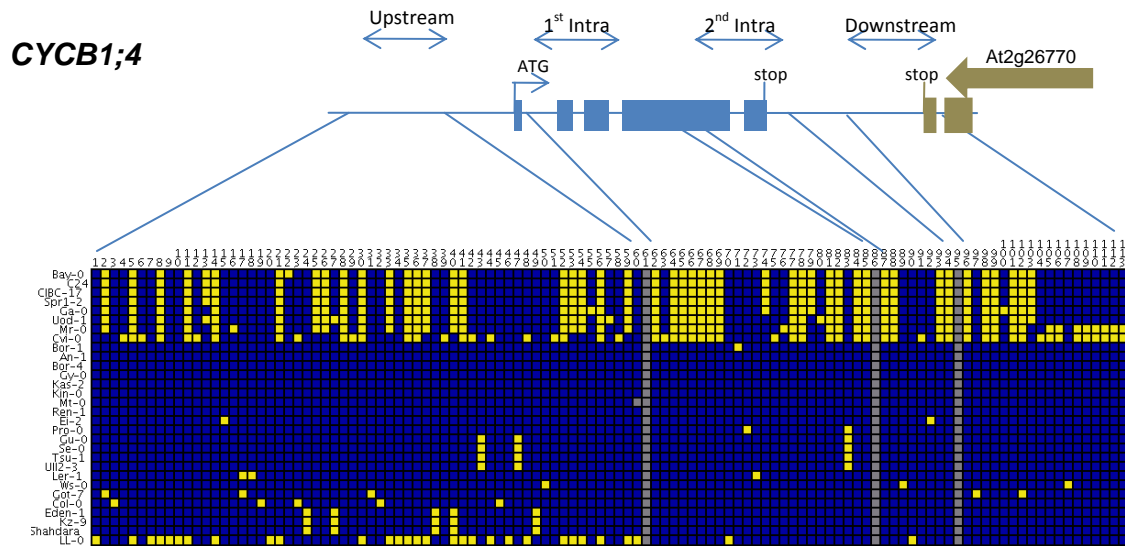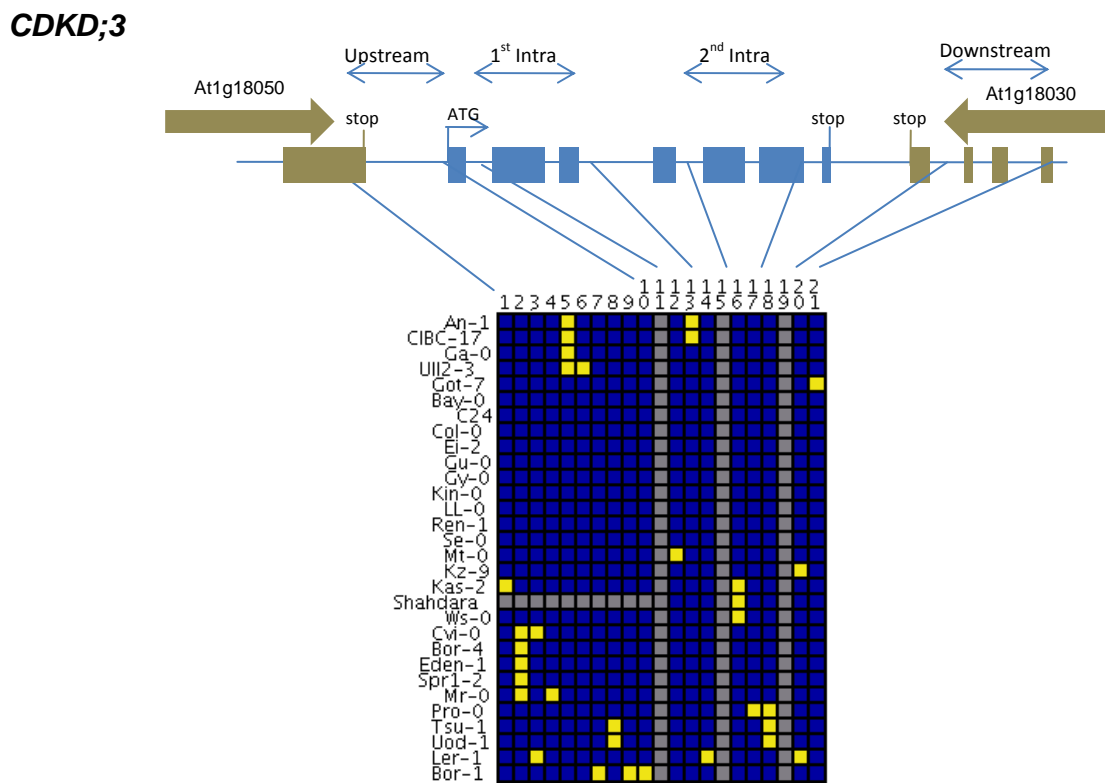

**CYCB1;2**

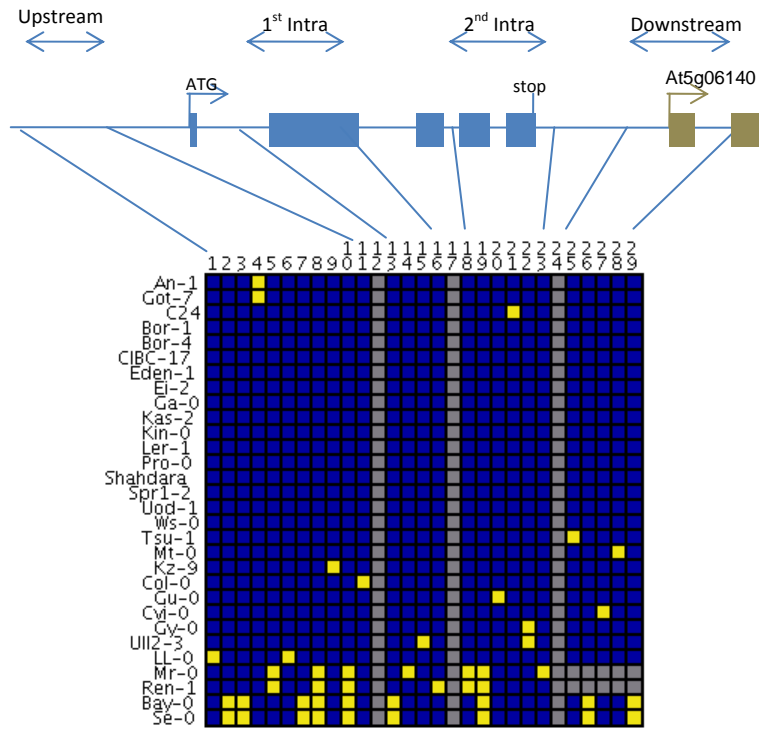

**E2Fa**

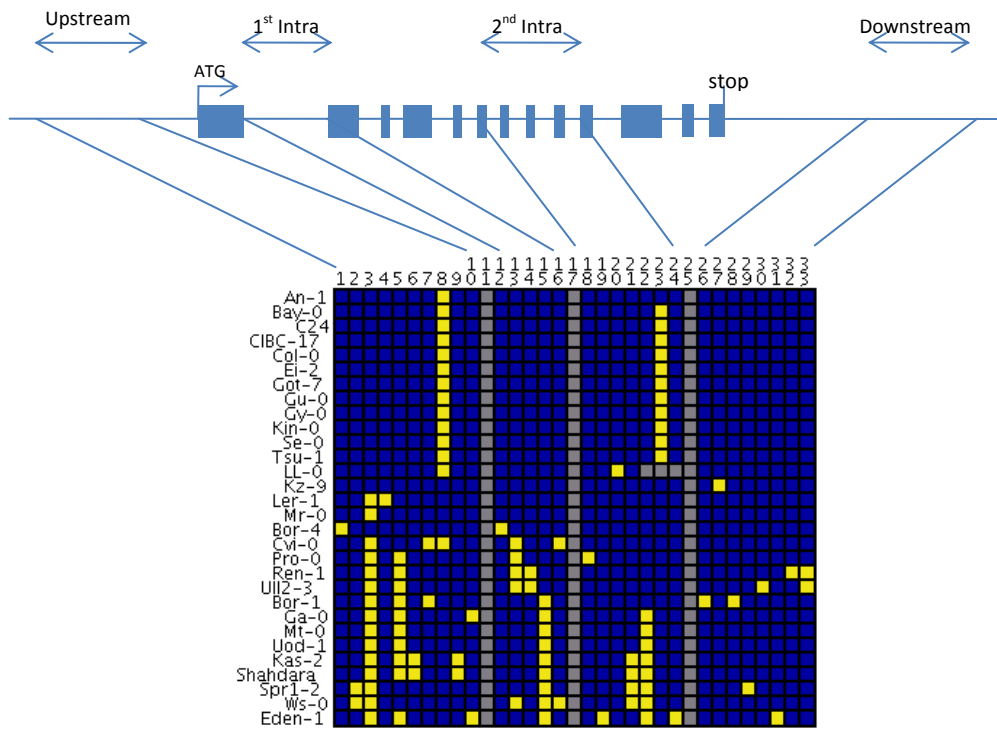

**Supplemental Figure 2.** Visual representation of haplotypes of the *CYCB1;4*, *CDKD;3*, *CYCB1;2* and *E2Fa* loci.

### Supplemental Table 1. List of accessions used

Seeds are available from the Nottingham *Arabidopsis* Stock Center (NASC) under the stock numbers indicated, or as part from the “2010” collection of Nordborg *et al.* (2005) under stock number N22660

---

| Accession | Stock number |
|-----------|--------------|
| An-1      | N22626       |
| Bay-0     | N22633       |
| Bor-1     | N22590       |
| Bor-4     | N22591       |
| C24       | N22620       |
| CIBC-17   | N22603       |
| Col-0     | N22625       |
| Cvi-0     | N22614       |
| Eden-1    | N22572       |
| Ei-2      | N22616       |
| Ga-0      | N22634       |
| Got-7     | N22608       |
| Gu-0      | N22617       |
| Gy-0      | N22631       |
| Kas-2     | N22638       |
| Kin-0     | N22654       |
| Kz-9      | N22607       |
| Ler-1     | N22618       |
| LL-0      | N22650       |
| Mr-0      | N22640       |
| Mt-0      | N22642       |
| Pro-0     | N22649       |

|          |        |
|----------|--------|
| Ren-1    | N22610 |
| Se-0     | N22646 |
| Shahdara | N22652 |
| Spr1-2   | N22582 |
| Tsu-1    | N22641 |
| Ull2-3   | N22587 |
| Uod-1    | N22612 |
| Ws-0     | N22623 |

---

**Supplemental Table 2. Summary of nucleotide diversity**

| <b>CCC</b>                       | <b>#genes</b> | <b>Average length (bp)</b> | <b>Average <math>\theta_w</math></b> |
|----------------------------------|---------------|----------------------------|--------------------------------------|
| Intron Sites                     | 60            | 489                        | 0.00662                              |
| Exon Sites                       | 61            | 665                        | 0.00338                              |
| Synonymous Sites                 | 61            | 145                        | 0.00745                              |
| Nonsynonymous Sites              | 61            | 520                        | 0.00227                              |
| Total Intragenic Sites           | 61            | 1145                       | 0.00474                              |
| Upstream Sites                   | 58            | 535                        | 0.00892                              |
| Downstream Sites                 | 49            | 480                        | 0.00697                              |
| <b>Nordborg data set</b>         |               |                            |                                      |
| Intron Sites <sup>a</sup>        | 525           | 274                        | 0.00761                              |
| Exon Sites <sup>b</sup>          | 759           | 430                        | 0.00438                              |
| Synonymous Sites <sup>b</sup>    | 759           | 96                         | 0.00985                              |
| Nonsynonymous Sites <sup>b</sup> | 759           | 334                        | 0.00249                              |
| Total Intragenic Sites           | 1029          | 507                        | 0.00523                              |
| Upstream Sites                   | 127           | 367                        | 0.00670                              |
| Downstream Sites                 | 120           | 309                        | 0.00766                              |

<sup>a</sup> Only fragments with at least 100 bp intron sites are analyzed.

<sup>b</sup> Only fragments with at least 80 codons are analyzed

**Supplemental Table 3. Data for the CCC frameshifts**

| <b>Gene name</b> | <b>Amino acids</b> | <b>Accessions</b> | <b>Frameshift position</b> | <b>Stop codon position</b> |
|------------------|--------------------|-------------------|----------------------------|----------------------------|
| <i>CDKB1;2</i>   | 310                | Kas-2             | 112                        | 123                        |
|                  |                    | An-1,CIBC-17      | 127                        | 127                        |
|                  |                    | Ei-2,Gy-0         |                            |                            |
|                  |                    | Ler-1,LL-0,Pro-0  |                            |                            |
|                  |                    | Bay-0,Ga-0,Ull2-3 | 146                        | 153                        |
|                  |                    | Gu-0              | 301                        | undetermined               |
| <i>CYCD7;1</i>   | 341                | Mr-0              | No                         | 288                        |
| <i>CYCA3;3</i>   | 327                | Uod-1             | No                         | 296                        |

Supplemental Table 4. Summary statistics for coding sequence

| Gene    | <i>Ka/Ks</i> | <i>dN<sup>a</sup></i> | <i>dS<sup>b</sup></i> | <i>pN<sup>c</sup></i> | <i>pS<sup>d</sup></i> | MK- <i>p<sup>e</sup></i> | MK- <i>p<sup>f</sup></i> | $\gamma^g$ | $\gamma$ 95% CI <sup>h</sup> | <i>k<sup>i</sup></i> |
|---------|--------------|-----------------------|-----------------------|-----------------------|-----------------------|--------------------------|--------------------------|------------|------------------------------|----------------------|
| CDKA;1  | 0.020        | 0                     | 9                     | 0                     | 1                     | 1                        | 1                        | Na         | Na                           | 1                    |
| CDKB1;1 | 0.089        | 5                     | 16                    | 0                     | 2                     | 1                        | 1                        | 0.096      | -1.093/1.448                 | 1                    |
| CDKB1;2 | na           | na                    | na                    | na                    | na                    | na                       | na                       | na         | na                           | na                   |
| CDKB2;1 | 0.028        | 2                     | 15                    | 2                     | 1                     | 0.088                    | 1                        | -0.633     | -1.887/0.704                 | 1                    |
| CDKB2;2 | 0.019        | 1                     | 14                    | 1                     | 6                     | 1                        | 1                        | -0.497     | -1.865/0.943                 | 1                    |
| CDKC;1  | 0.094        | 4                     | 6                     | 1                     | 0                     | 0.455                    | 1                        | -0.192     | -1.399/1.137                 | 1                    |
| CDKC;2  | 0.114        | 6                     | 13                    | 1                     | 1                     | 1                        | 1                        | -0.061     | -1.193/1.236                 | 1                    |
| CDKD;1  | 0.094        | 7                     | 22                    | 7                     | 11                    | 0.336                    | 1                        | -1.027     | -1.951/-0.030                | 1                    |
| CDKD;2  | 0.055        | 5                     | 40                    | 3                     | 3                     | 0.042                    | 1                        | -0.546     | -1.648/0.707                 | 1                    |
| CDKD;3  | 0.096        | 5                     | 19                    | 2                     | 2                     | 0.253                    | 1                        | -0.351     | -1.477/0.947                 | 1                    |
| CDKE;1  | 0.104        | 13                    | 44                    | 0                     | 9                     | 0.186                    | 1                        | 0.429      | -0.667/1.766                 | 1                    |
| CDKF;1  | 0.161        | 8                     | 33                    | 0                     | 2                     | 1                        | 1                        | 0.233      | -0.920/1.580                 | 2                    |
| CKS1    | 0.045        | 1                     | 11                    | 0                     | 0                     | na                       | na                       | -0.211     | -1.606/1.290                 | 1                    |
| CKS2    | 0            | 0                     | 7                     | 0                     | 4                     | 1                        | 1                        | na         | na                           | 1                    |
| CYCA1;1 | 0.077        | 6                     | 19                    | 6                     | 10                    | 0.485                    | 1                        | -0.972     | -1.947/0.108                 | 1                    |
| CYCA1;2 | 0.293        | 22                    | 15                    | 11                    | 5                     | 0.758                    | 1                        | -0.647     | -1.349/0.173                 | 4                    |
| CYCA2;1 | 0.315        | 29                    | 27                    | 5                     | 1                     | 0.209                    | 1                        | 0.209      | -0.650/1.281                 | 4                    |
| CYCA2;2 | 0.210        | 8                     | 10                    | 2                     | 3                     | 1                        | 1                        | -0.137     | -1.202/1.125                 | 3                    |
| CYCA2;3 | 0.226        | 12                    | 15                    | 8                     | 4                     | 0.301                    | 1                        | -0.805     | -1.627/0.121                 | 3                    |
| CYCA2;4 | 0.405        | 12                    | 10                    | 4                     | 4                     | 1                        | 1                        | -0.267     | -1.224/0.874                 | 5                    |
| CYCA3;1 | 0.155        | 14                    | 24                    | 18                    | 23                    | 0.647                    | 1                        | -1.470     | -2.108/-0.809                | 2                    |
| CYCA3;2 | 0.186        | 16                    | 37                    | 8                     | 20                    | 1                        | 1                        | -0.609     | -1.411/0.308                 | 2                    |
| CYCA3;3 | 0.453        | 25                    | 22                    | 26                    | 2                     | 0.000                    | 0.017                    | -1.384     | -1.902/-0.847                | 5                    |
| CYCA3;4 | 0.135        | 10                    | 19                    | 6                     | 5                     | 0.295                    | 1                        | -0.678     | -1.608/0.376                 | 2                    |
| CYCB1;1 | 0.148        | 14                    | 25                    | 4                     | 2                     | 0.199                    | 1                        | -0.170     | -1.117/0.955                 | 2                    |
| CYCB1;2 | 0.096        | 8                     | 16                    | 2                     | 0                     | 0.138                    | 1                        | -0.148     | -1.202/1.093                 | 1                    |
| CYCB1;3 | 0.262        | 26                    | 45                    | 8                     | 0                     | 0.001                    | 0.041                    | -0.217     | -0.992/0.732                 | 4                    |
| CYCB1;4 | 0.171        | 19                    | 32                    | 6                     | 5                     | 0.326                    | 1                        | -0.227     | -1.071/0.782                 | 2                    |
| CYCB2;1 | 0.213        | 10                    | 15                    | 22                    | 22                    | 0.461                    | 1                        | -1.875     | -2.549/-1.232                | 3                    |
| CYCB2;2 | 0.304        | 13                    | 13                    | 6                     | 0                     | 0.059                    | 1                        | -0.508     | -1.382/0.532                 | 4                    |
| CYCB2;3 | 0.284        | 11                    | 14                    | 3                     | 6                     | 0.704                    | 1                        | -0.163     | -1.136/1.011                 | 4                    |
| CYCB2;4 | 0.150        | 9                     | 17                    | 3                     | 0                     | 0.060                    | 1                        | -0.265     | -1.285/0.929                 | 2                    |
| CYCB3;1 | 0.213        | 14                    | 21                    | 4                     | 2                     | 0.377                    | 1                        | -0.165     | -1.112/0.964                 | 3                    |
| CYCD1;1 | 0.127        | 6                     | 16                    | 5                     | 13                    | 1                        | 1                        | -0.815     | -1.804/0.301                 | 2                    |
| CYCD2;1 | 0.233        | 10                    | 13                    | 3                     | 2                     | 0.639                    | 1                        | -0.201     | -1.211/1.009                 | 3                    |
| CYCD3;1 | 0.262        | 14                    | 13                    | 6                     | 3                     | 0.700                    | 1                        | -0.452     | -1.325/0.597                 | 4                    |
| CYCD3;2 | 0.168        | 16                    | 28                    | 6                     | 3                     | 0.140                    | 1                        | -0.367     | -1.211/0.656                 | 2                    |
| CYCD3;3 | 0.257        | 10                    | 13                    | 0                     | 2                     | 0.5                      | 1                        | 0.341      | -0.768/1.703                 | 4                    |
| CYCD4;1 | 0.387        | 13                    | 8                     | 4                     | 1                     | 0.628                    | 1                        | -0.221     | -1.169/0.911                 | 5                    |
| CYCD4;2 | 0.317        | 10                    | 14                    | 6                     | 2                     | 0.220                    | 1                        | -0.682     | -1.562/0.317                 | 4                    |
| CYCD5;1 | 0.288        | 24                    | 24                    | 3                     | 6                     | 0.476                    | 1                        | 0.331      | -0.593/1.494                 | 4                    |
| CYCD6;1 | 0.247        | 16                    | 18                    | 7                     | 7                     | 1                        | 1                        | -0.485     | -1.295/0.487                 | 3                    |
| CYCD7;1 | 0.319        | 25                    | 25                    | 28                    | 20                    | 0.426                    | 1                        | -1.455     | -1.966/-0.928                | 4                    |



|        |       |    |    |   |   |       |       |        |              |   |
|--------|-------|----|----|---|---|-------|-------|--------|--------------|---|
| CYCH;1 | 0.326 | 8  | 9  | 4 | 3 | 1     | 1     | -0.497 | -1.512/0.666 | 4 |
| DEL1   | 0.123 | 12 | 23 | 1 | 3 | 1     | 1     | 0.229  | -0.840/1.506 | 2 |
| DEL2   | 0.643 | 14 | 10 | 5 | 4 | 1     | 1     | -0.317 | -1.214/0.764 | 6 |
| DEL3   | 0.268 | 14 | 18 | 3 | 2 | 0.644 | 1     | -0.018 | -0.966/1.156 | 4 |
| DPa    | 0.048 | 2  | 18 | 1 | 4 | 0.504 | 1     | -0.380 | -1.675/0.998 | 1 |
| DPb    | 0.280 | 5  | 13 | 2 | 3 | 0.621 | 1     | -0.349 | -1.475/0.960 | 4 |
| E2Fa   | 0.170 | 3  | 5  | 1 | 0 | 0.444 | 1     | -0.286 | -1.507/1.052 | 2 |
| E2Fb   | 0.221 | 5  | 10 | 1 | 2 | 1     | 1     | -0.117 | -1.283/1.264 | 3 |
| E2Fc   | 0.244 | 8  | 9  | 0 | 1 | 1     | 1     | 0.238  | -0.856/1.591 | 3 |
| KRP1   | 0.552 | 19 | 6  | 8 | 6 | 0.287 | 1     | -0.468 | -1.265/0.477 | 6 |
| KRP2   | 0.180 | 15 | 25 | 2 | 1 | 0.552 | 1     | 0.179  | -0.808/1.369 | 2 |
| KRP3   | 0.202 | 12 | 19 | 3 | 5 | 1     | 1     | -0.119 | -1.108/1.076 | 3 |
| KRP4   | 0.277 | 16 | 19 | 5 | 2 | 0.410 | 1     | -0.216 | -1.091/0.894 | 4 |
| KRP5   | 0.547 | 12 | 7  | 1 | 0 | 1     | 1     | 0.227  | -0.838/1.522 | 6 |
| KRP6   | 0.648 | 24 | 6  | 2 | 5 | 0.016 | 0.931 | 0.469  | -0.489/1.684 | 6 |
| KRP7   | 0.410 | 6  | 3  | 4 | 2 | 1     | 1     | -0.656 | -1.684/0.527 | 5 |
| Rb     | 0.157 | 5  | 11 | 0 | 3 | 0.530 | 1     | 0.086  | -1.116/1.487 | 2 |
| Wee1   | 0.148 | 11 | 24 | 1 | 2 | 1     | 1     | 0.189  | -0.874/1.481 | 2 |

<sup>a</sup> Total number of fixed non synonymous mutations

<sup>b</sup> Total number of fixed synonymous mutations

<sup>c</sup> Total number of polymorphic non synonymous mutations

<sup>d</sup> Total number of polymorphic non synonymous mutations

<sup>e</sup> *P*-value of the MK-test

<sup>f</sup> Bonferroni corrected *P*-value of the MK-test

<sup>g</sup> MKPRF selection parameter

<sup>h</sup> 95% Confidence Interval of the MKPRF selection parameter

<sup>i</sup> *Ka/Ks* cluster number based on partitioning around medoids algorithm
